# Supplementary material
Source: publisher figshare collection journal article supplement (https://acs.figshare.com/ndownloader/files/22686887)
Supplement: Supplementary file 1 [file 22686887]

# Exfoliation of $\alpha$ -Zirconium Phosphate Using Tetraalkylammonium Hydroxides

*Hao Ding,<sup>1,2</sup> Sana T. Khan,<sup>2</sup> Keanu N. Aguirre,<sup>2</sup> Robert S. Camarda,<sup>2</sup> John B. Gafney,<sup>2</sup>*

*Abraham Clearfield,<sup>3</sup> Luyi Sun<sup>\*1,2,4</sup>*

<sup>1</sup>Polymer Program, Institute of Materials Science, University of Connecticut, Storrs,  
Connecticut 06269, United States

<sup>2</sup>Department of Chemical and Biomolecular Engineering, University of Connecticut,  
Storrs, Connecticut 06269, United States

<sup>3</sup>Department of Chemistry, Texas A&M University, College Station, Texas 77842, United

States

<sup>4</sup>Department of Biomedical Engineering, University of Connecticut, Storrs, CT 06269,

United States

\*Author to whom correspondence should be addressed:

Dr. Luyi Sun, Tel: (860) 486-6895; Fax: (860) 486-4745; Email: [luyi.sun@uconn.edu](mailto:luyi.sun@uconn.edu)

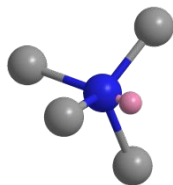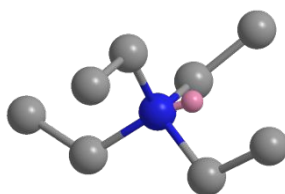

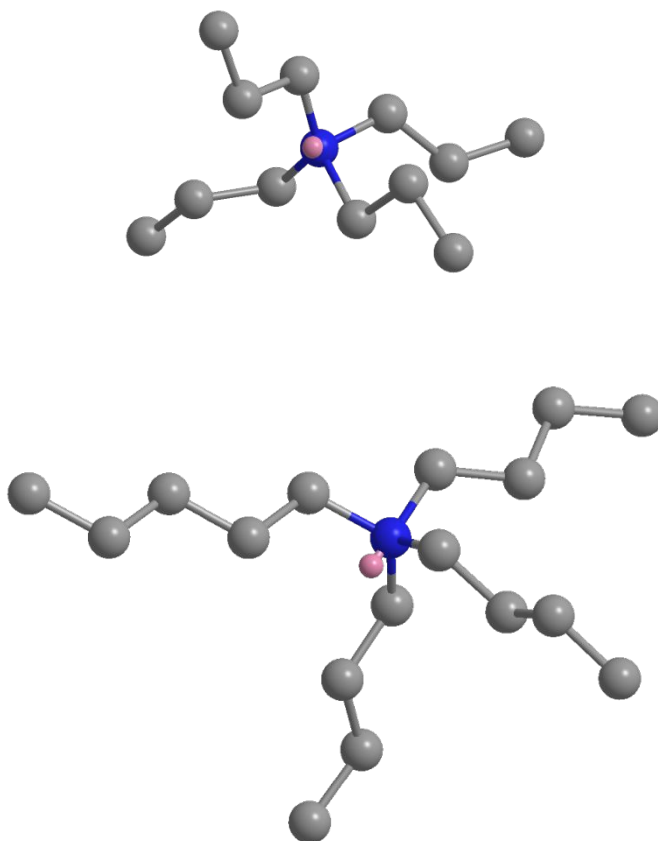

**Figure S1.** Structure of TXA cations, with the blue balls for nitrogen, grey for carbon and pink for the lone pair (from top to bottom: TMA, TEA, TPA, and TBA) simulated using ChemBio3D Ultra 13.0 under the lowest energy.
